# Supplementary material
Source: PubMed Central journal article supplement (PMC3268194)

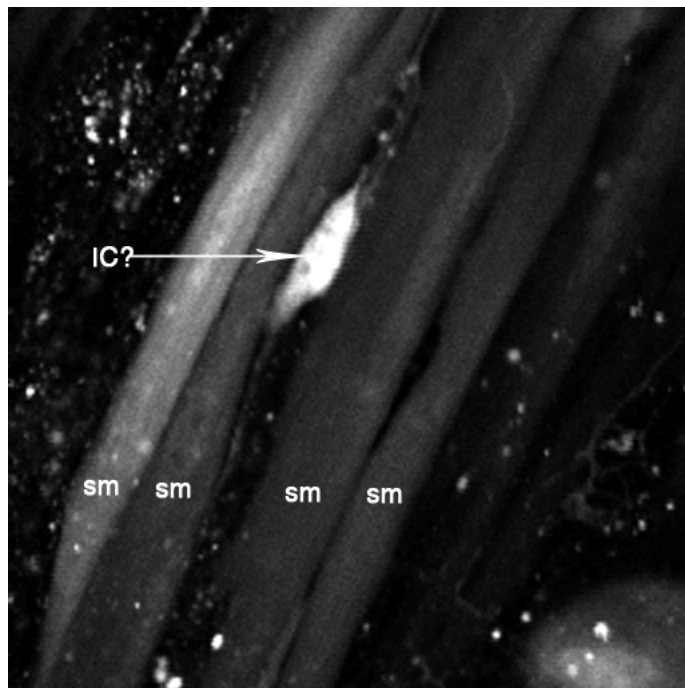

Supplement: bph0165-0401-SD3.pdf [file bph0165-0401-SD3.pdf]
